# Supplementary material for: The 4-α-Glucanotransferase AcbQ Is Involved in Acarbose Modification in Actinoplanes sp. SE50/110
Source: MDPI journal article supplement (doi:10.3390/microorganisms11040848), 2023-03-27
Supplement: s1 [file s1]

***Supplementary materials: The 4- $\alpha$ -Glucanotransferase AcbQ is Involved in Acarbose Modification in *Actinoplanes* sp. SE50/110***

**Sophia Nölting, Camilla März, Lucas Jacob, Marcus Persicke, Susanne Schneiker-Bekel and Jörn Kalinowski**

**Table S1.** Bacterial strains used in this study.

| Strains                                      | Relevant Genotype/Description                                                                                                                                                                                                                                | Source/Reference            |
|----------------------------------------------|--------------------------------------------------------------------------------------------------------------------------------------------------------------------------------------------------------------------------------------------------------------|-----------------------------|
| <i>E. coli</i> DH5α                          | Δ <i>lacU</i> 169 (φ80 <i>lacZ</i> ΔM15) <i>supE</i> 44 <i>hsdR</i> 17 (r <sub>K</sub> <sup>-</sup> , m <sub>K</sub> <sup>+</sup> ) <i>recA</i> 1<br><i>endA</i> 1 <i>gyrA</i> 96 <i>thi</i> -1 <i>relA</i> 1                                                | Hanahan, 1983               |
| <i>E. coli</i> JM109                         | Δ( <i>lac-proAB</i> ) [F' <i>traD</i> 36, <i>proAB</i> , <i>lacI</i> <sup>q</sup> ΔM15] <i>supE</i> 44<br><i>hsdR</i> 17 (r <sub>K</sub> <sup>-</sup> , m <sub>K</sub> <sup>+</sup> ) <i>recA</i> 1 <i>endA</i> 1 <i>gyrA</i> 96 <i>thi</i> -1 <i>relA</i> 1 | Yanisch-Perron et al., 1985 |
| <i>E. coli</i> JM109 pJOE5751.1- <i>acbQ</i> | <i>E. coli</i> JM109 plus pJOE5751.1- <i>acbQ</i>                                                                                                                                                                                                            | This study                  |
| <i>E. coli</i> JM109 pJOE5751.1- <i>acbK</i> | <i>E. coli</i> JM109 plus pJOE571.1- <i>acbK</i>                                                                                                                                                                                                             | This study                  |

**Table S2.** Genes from *Actinoplanes* sp. SE50/110 used in this study. Capital letters indicate the sequence corresponding to the plasmid.

| <i>acb</i> Gene | Gene Number        | Codon-Optimized Gene Sequence (5' → 3')                                                                                                                                                                                                                                                                                                                                                                                                                                                                                                                                                                                                                                                                                                                                                                                                                                                                                                                                                                                                                                                                                                                                                                                                                                                                                                                                                                                                                                                                                                                                                                                                                                                                                                                                                                                                                                                                                                                                                                                                                                                                                                                                                                                                                                      | Putative Protein Function        |
|-----------------|--------------------|------------------------------------------------------------------------------------------------------------------------------------------------------------------------------------------------------------------------------------------------------------------------------------------------------------------------------------------------------------------------------------------------------------------------------------------------------------------------------------------------------------------------------------------------------------------------------------------------------------------------------------------------------------------------------------------------------------------------------------------------------------------------------------------------------------------------------------------------------------------------------------------------------------------------------------------------------------------------------------------------------------------------------------------------------------------------------------------------------------------------------------------------------------------------------------------------------------------------------------------------------------------------------------------------------------------------------------------------------------------------------------------------------------------------------------------------------------------------------------------------------------------------------------------------------------------------------------------------------------------------------------------------------------------------------------------------------------------------------------------------------------------------------------------------------------------------------------------------------------------------------------------------------------------------------------------------------------------------------------------------------------------------------------------------------------------------------------------------------------------------------------------------------------------------------------------------------------------------------------------------------------------------------|----------------------------------|
| <i>acbQ</i>     | <i>ACSP50_3601</i> | <p>atgaccaccactaccgacgcagctctgatcgagctcgaggccgctacggcggttccggttgactggaccacgactcgtggtgagccacgcactg<br/> ttctctgctgacacatccagcgcacatcctggctgtctcgggtgttgacgcattctccggccctgctatcgagctgcactgcgcgctgctgatgacga<br/> cgcacgtcaccgccttctccattctgctgtgttgctccgtaggggtgaaccagctcgcggcggttaccctgttgtaggtgctgcatacgtctggct<br/> accgaggatggcggccgtcagagaccgctgaccacgttaacgacctgggtcgcctcccaatcggctaccacacactgctgtgttcgctgttggtg<br/> atcgttccgcagctgcacctgtcatcgttctccagcagttcttgaccacccagaccgcgctcactgggggtgtgctagctcagatctactccgtct<br/> ctctgaacgctctcgggcatgggtgacctgggtgatctcgtgacctgaccggttggtctgcacgctcggggcgcttattcgttcttgtaacca<br/> atgcacgcatacgttccagaccgtctcgtgatccaacccctaccgccagggttccgctgcctcgtgacctatgtactgctgctcgtcagct<br/> cgctgagtagctactgctgagcctgcagtgccgctgaactgatcgtgctgcacgccaggggccacgagctgaccgctgaggttctgcaccgc<br/> aacgctctgatcaccgtgcacgcgtttggccagttaagcgcgaacgctcttgaacgctttaccgcgcaccacgtaccgctggccgctccgcagct<br/> ctagctgttttaccgcacgtgagggctcgtggccttgaggactacgctacttgggtgctcactcgtcgaagtctacggcaccgcctggcggttcttg<br/> cctgctgcactgcagttccacacggtccagctgttgcagctgcacgccgtgagctcgttgatcgtattgacttccaccgctggctgctgttgcttg<br/> ttgacgagcagatggcagctgcacagcgtgcagctgttggctccggcatggcaatcgggtgtcatccacgactcgtgttggcgttgacctgaa<br/> ggcgctgcacgcatgggctgttcaggatcacctggcagggtggcgtcaccgtgggctgccagctgacgacttcaacccactcggtcaggattgg<br/> ggcctgctccatggcgtccagacaccccttctgaggctggctaccgccccttctgcagctcatcgtgtgactctacgccactccggcgctacc<br/> gtcttgatcacatcctgggccttctccgctgtgtggatccacgctgggtccggcgacgtgacggcgcttacgttcttgacgaccacgaggcaa<br/> tgcttggtgtctctcgtgttgaagcaltccgcgtcgtgcgcaatgatcatcgggtgaggatctgggcaccgttaccacgctgttcgtctgagctcg<br/> ctgaccgcggtatctgggacacctgtctctcgttccaataaccaggcggttctgagaaccgtcagccctctactctgtagaccagtggcgctg<br/> caggctgtctcgtacacctgactaccacgactgccatccacgcagcttggctctccgggtgagcacgttgacctgacgagccgcttggctcct<br/> gaaccgtctcgcgtgaagttgcagctgatctgcagctgagcgtgacggctgctggctgagctcgcgcaccggcctgcttgaacacga<br/> gactgctgtttcagggtatgtccgctgagctcttgactacacggtttcctcgtcgcacccagctcgtctggctggcggtgtggctccctgacctgg<br/> ttggtgatccggtccacgaacacctcctggcacctccaccgaattccctaaactggcagctcccagttgctgacgtgcaggtgcgccagtcgctat<br/> gggatgacctggcatcctcgtcggcgacaggtgttgcaggcctctacgtgcactgctgagcctgctactaccccataa</p> | 4- $\alpha$ -Glucanotrans-ferase |
| <i>acbK</i>     | <i>ACSP50_3602</i> | <p>ATTACGCATCATCATCATCATGATGCCctgagcacaccgacgttctcgttctggcgggcgaggtgttgacacca<br/> tcgcttacgtccagagctcccactgctttccagattctacgttgttgacgtattgaacctcgcgaggccagactggtgacaacgtcgtctt<br/> ggcctccacacctgggtctccgaccatgcacgttgacgttctgggtgatgaccagagggtgacctgttccgcatccacacctgcaggc<br/> ctaccttctcgtcactccaaactcctcagcgcacaaagcgcgtctttaaactcgtcgtccagatgcccctcgcctctccctgtcggagcgtcc<br/> </p>                                                                                                                                                                                                                                                                                                                                                                                                                                                                                                                                                                                                                                                                                                                                                                                                                                                                                                                                                                                                                                                                                                                                                                                                                                                                                                                                                                                                                                                                                                                                                                                                                                                                                                                                                                                                                                                                                    | Acarbose 7-phos-photransferase   |

cgtgaggctgaagaggaccgttacctgcagctctgatcgcagctcacaccgcacacgctcgccacgtgcagctctgcatccccacctggc  
 agcacgttttcggccagctgaacgatctctctgactgtttctaccgacctccacaactgggacggcgcatagaggggttcgaggttacgcat  
 tcaacgtgatctgggtctctctccgcaaccgctgacccagcttgacgtactatgcgtcggttatgaccgtggccgacgctggtcg  
 tggctaccgatggcgacacgggtggctccgttctgtcggtgagaccgaggtccgctgctacgtgcagttgctccagaagcaccagttgt  
 tgactccaacggcgctggtagcattcgtctccggttctattcgccacctgctggtgagcctctgagacctgtctgctgacggcgcaatc  
 gctggtgcatagcatcactatccctgaacccgctgcgcaattgatcgtgctgactcctcgccagctgcataaGCTTGGCTGT  
 TTTGGCGGATGAGAGAAGAT

**Table S3.** Oligonucleotides used in this study. Capital letters indicate the sequence corresponding to the plasmid.

| Primer           | Sequence (5' → 3')                   |
|------------------|--------------------------------------|
| <i>acbQ</i> _fwd | ATTACGCATCATCATCATCATGATCCaccaccacta |
| <i>acbQ</i> _rev | ccataaGCTTGGCTGTTTTGGCGGATGAGAGAAGAT |
| <i>acbK</i> _fwd | ATTACGCATCATCATCATCATGATCC           |
| <i>acbK</i> _rev | GGCTGTTTTGGCGGATGAGAGAAGAT           |

**Table S4.** Plasmids used in this study.

| Plasmid                 | Description                                                                                 | Source/Reference      |
|-------------------------|---------------------------------------------------------------------------------------------|-----------------------|
| pJOE5751.1              | pBR322-based L-rhamnose-inducible vector, His <sub>6</sub> - <i>eGFP</i> , Amp <sup>R</sup> | Hoffmann et al., 2012 |
| pJOE5751.1- <i>acbQ</i> | pJOE5751.1 containing <i>acbQ</i> gene                                                      | This study            |
| pJOE5751.1- <i>acbK</i> | pJOE5751.1 containing <i>acbK</i> gene                                                      | This study            |

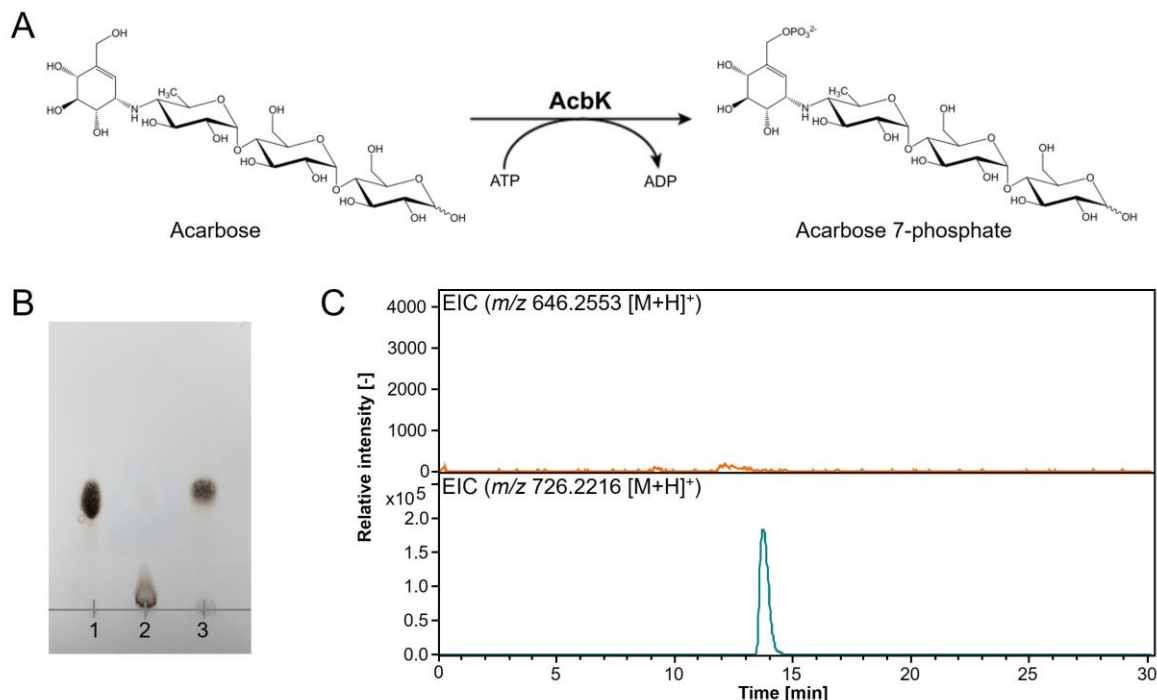

**Figure S1.** Enzymatic preparation of acarbose 7-phosphate by AcbK. (A) Scheme of AcbK reaction. (B) TLC analysis of AcbK assay, lane 1: acarbose standard, lane 2: AcbK assay, lane 3: Assay with inactivated AcbK (negative control). (C) LC-ESI-MS analysis of AcbK assay. ESI (+) EIC for acarbose  $m/z$  646.2553 (top chromatogram), ESI (+) EIC for acarbose 7-phosphate  $m/z$  726.2216 (bottom chromatogram).

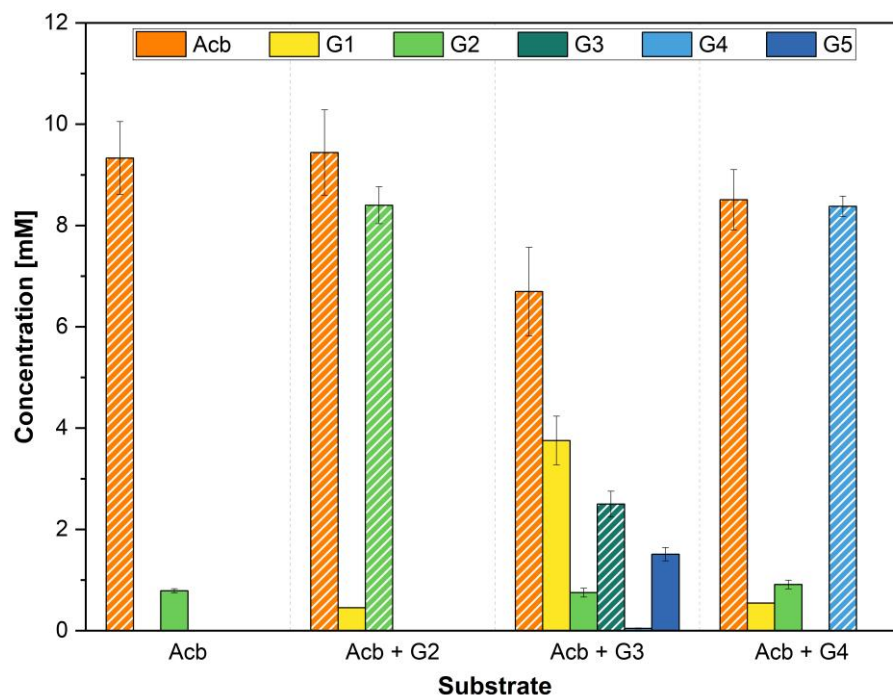

**Figure S2.** HPAEC-PAD analysis of AcbQ assays with acarbose with or without a single  $\alpha$ -1,4-glucan. Reaction mixtures contained acarbose only and acarbose mixed with maltose (G2), maltotriose (G3) and maltotetraose (G4), respectively. Measurements of product spectrum (glucans with chain lengths G1 – G5) of each assay combination are shown. Acarbose and glucans which were added as substrates to the assay are marked with stripes ( $n = 3$ ).

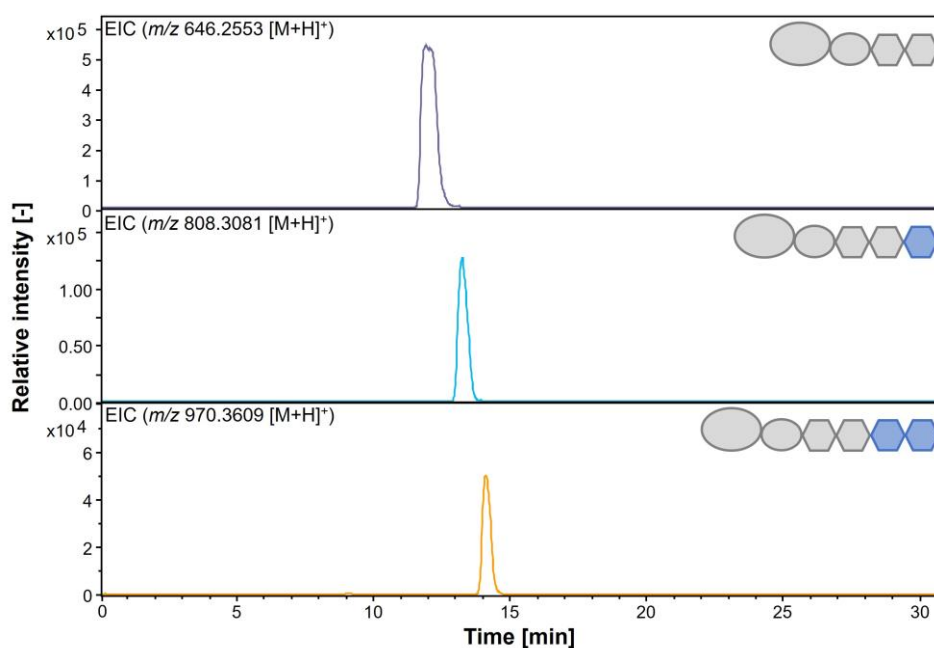

**Figure S3.** LC-ESI-MS analysis of AcbQ reaction mixture with acarbose and maltose. ESI (+) EIC for acarbose  $m/z$  646.2553 (top chromatogram), ESI (+) EIC for acarviosyl-maltotriose  $m/z$  808.3081 (middle chromatogram), ESI (+) EIC for acarviosyl-maltotetraose  $m/z$  970.3609 (bottom chromatogram).

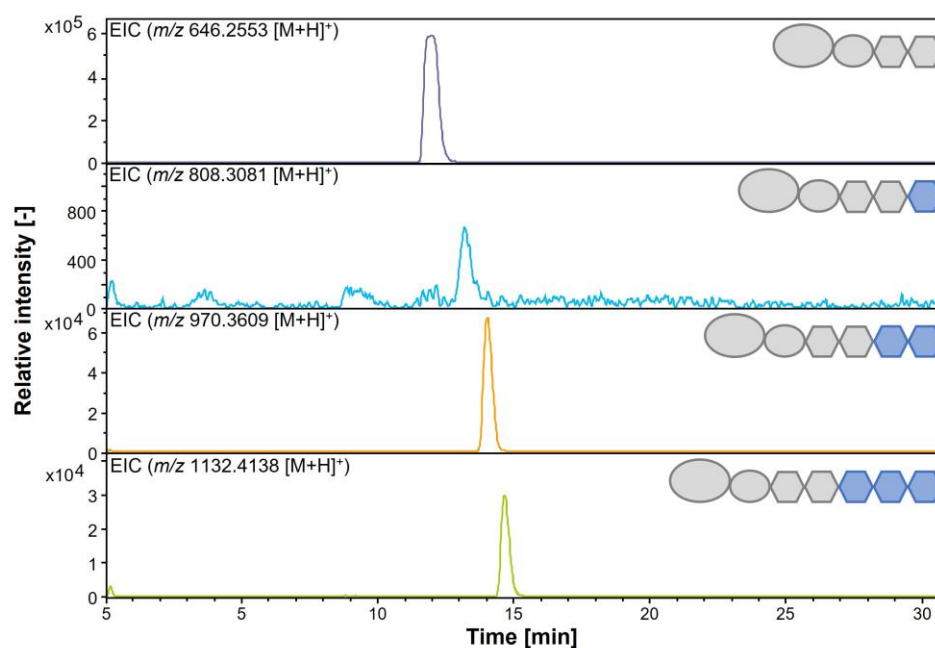

**Figure S4.** LC-ESI-MS analysis of AcbQ reaction mixture with acarbose and maltotetraose. ESI (+) EIC for acarbose  $m/z$  646.2553 (top chromatogram), ESI (+) EIC for acarviosyl-maltotriose  $m/z$  808.3081 (top middle chromatogram), ESI (+) EIC for acarviosyl-maltotetraose  $m/z$  970.3609 (bottom middle chromatogram). ESI (+) EIC for acarviosyl-maltopentaose  $m/z$  1132.4138 (bottom chromatogram).

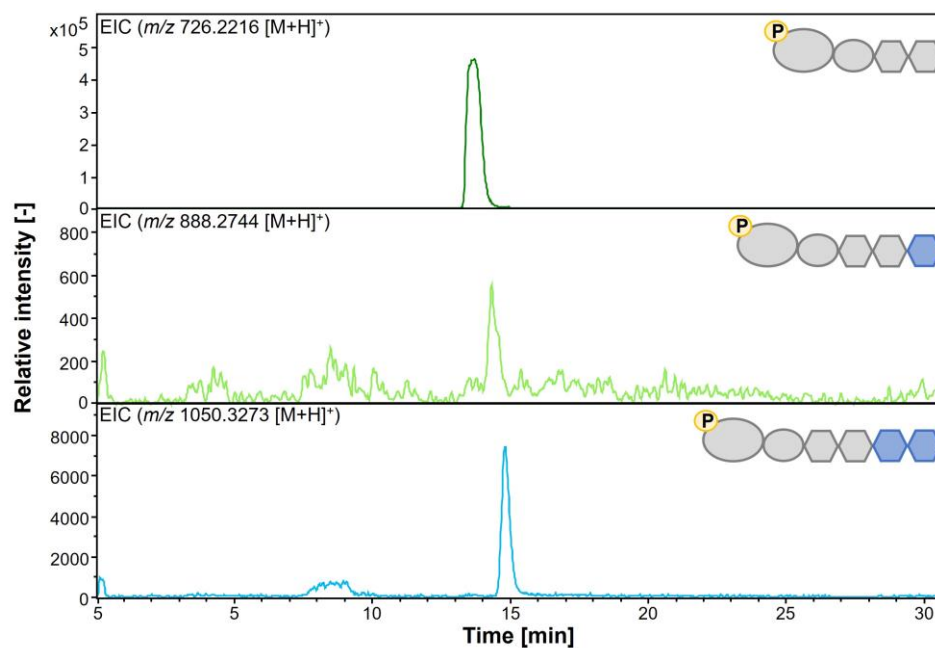

**Figure S5.** LC-ESI-MS analysis of AcbQ reaction mixture with acarbose 7-phosphate and maltose. ESI (+) EIC for acarbose 7-phosphate  $m/z$  726.2216 (top chromatogram), ESI (+) EIC for acarviosyl-maltotriose 7-phosphate  $m/z$  888.2744 (middle chromatogram), ESI (+) EIC for acarviosyl-maltotetraose 7-phosphate  $m/z$  1050.3273 (bottom chromatogram).

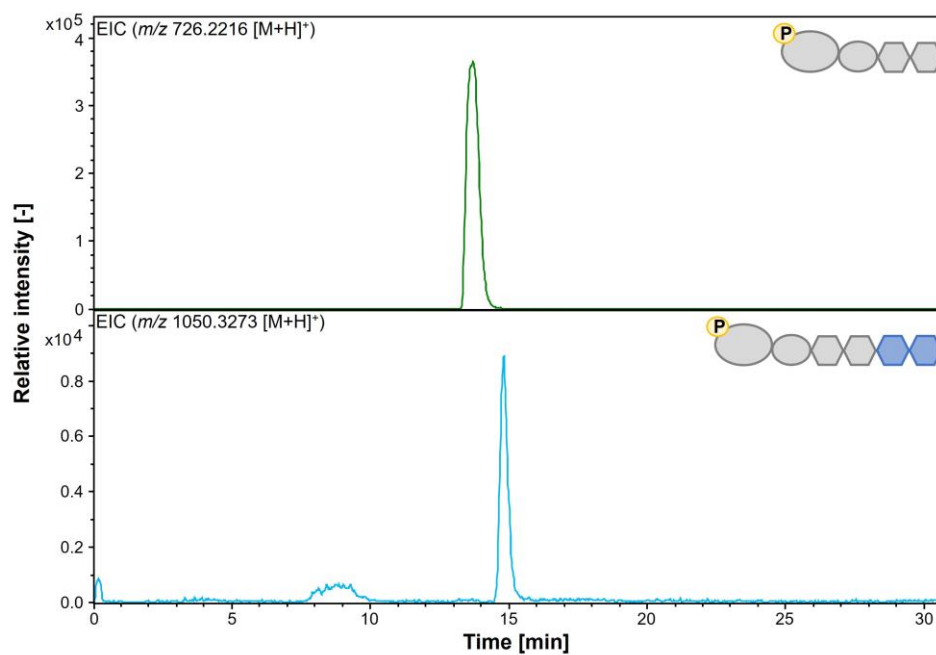

**Figure S6.** LC-ESI-MS analysis of AcbQ reaction mixture with acarbose 7-phosphate and maltotetraose. ESI (+) EIC for acarbose 7-phosphate  $m/z$  726.2216 (top chromatogram), ESI (+) EIC for acarviosyl-maltotetraose 7-phosphate  $m/z$  1050.3273 (bottom chromatogram).
